# Supplementary material for: Ni3+ doped cobalt–nickel layered double hydroxides as high-performance electrode materials for supercapacitors
Source: Royal Society of Chemistry journal article supplement (doi:10.1039/c7ra09427b), 2017-01-01
Supplement: c7ra09427b1.pdf [file c7ra09427b1.pdf]

## Electronic Supplementary Information

### $\text{Ni}^{3+}$ doped cobalt-nickel layered double hydroxides as high-performance electrode material for supercapacitors

H. M. Sun,<sup>a,b</sup> Y. X. Ye,<sup>a</sup> Z. F. Tian,<sup>a</sup> S. L. Wu,<sup>a</sup> J. Liu,<sup>\*a</sup> and C. H. Liang<sup>a,b</sup>

<sup>a</sup> Key Laboratory of Materials Physics and Anhui Key Laboratory of Nanomaterials and Nanotechnology, Institute of Solid State Physics, Chinese Academy of Sciences, Hefei 230031, China. E-mail: chliang@issp.ac.cn

<sup>b</sup> Department of Materials Science and Engineering, University of Science and Technology of China, Hefei 230026, China.

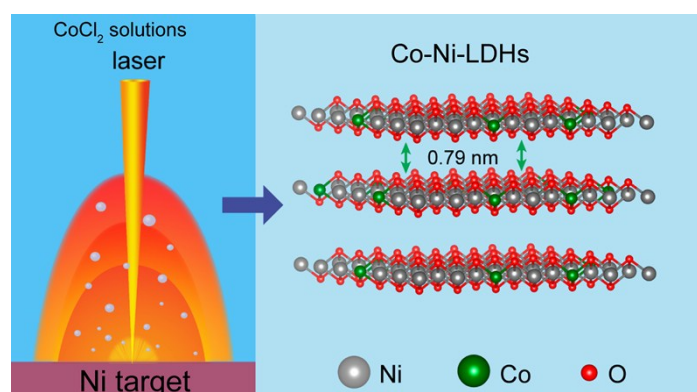

Figure S1 Laser-assisted assembly for Co-Ni-LDHs structure

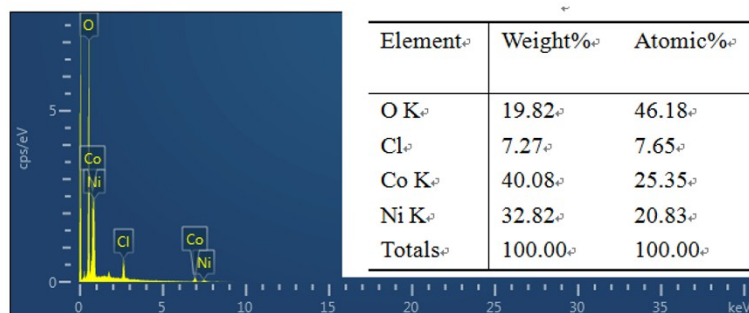

Figure S2 EDX spectrum and the table of corresponding elements calculation of  $\text{Co}_{0.55}\text{Ni}_{0.45}$ -LDHs

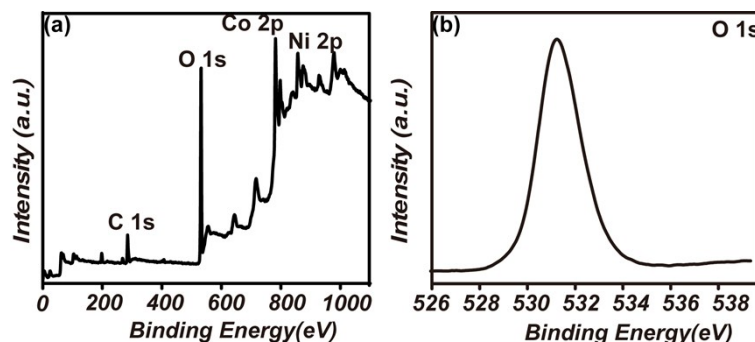

Figure S3 XPS spectra of  $\text{Co}_{0.55}\text{Ni}_{0.45}$ -LDHs (a) survey, (b) O 1s 2p

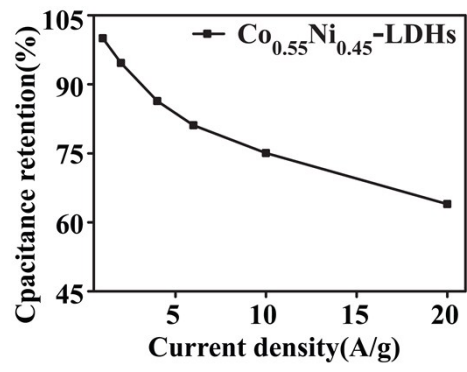

Figure S4 The specific capacitance retention of Co<sub>0.55</sub>Ni<sub>0.45</sub>-LDHs.
